# Supplementary material for: HIF2-Induced Long Noncoding RNA RAB11B-AS1 Promotes Hypoxia-Mediated Angiogenesis and Breast Cancer Metastasis
Source: Oxford University Press journal article supplement (doi:10.1158/0008-5472.can-19-1532), 2020-01-03
Supplement: 00085472can191532-sup-222376_3_supp_5984771_q30316.xlsx [file 00085472can191532-sup-222376_3_supp_5984771_q30316.xlsx]

## Sheet: Table S1
Supplementary Table S1. Oligonucleotide sequence used for qPCR primers
VEGFA mRNA	Forward: 5’-CTTGCCTTGCTGCTCTAC-3’
	Reverse: 5’-TGGCTTGAAGATGTACTCG-3’
ANGPTL4 mRNA	Forward: 5’-GTCCACCGACCTCCCGTTA-3’
	Reverse: 5’-CCTCATGGTCTAGGTGCTTGT-3’
RAB11B-AS1 RNA	Forward: 5’-GAGAACCTACCCGACTATCA-3’
	Reverse: 5’-GAAGTCAGTGAGACCAAGAAC-3’
RAB11B mRNA	Forward: 5’-AAGCACCTGACCTATGAGAAC-3’
	Reverse: 5’-TGACGATGTTGCTGTCTGC -3’
18S rRNA	Forward: 5’-CGGCGACGACCCATTCGAAC-3’
	Reverse: 5’-GAATCGAACCCTGATTCCCCGTC-3’
RPL13A mRNA	Forward: 5’-CTCAAGGTCGTGCGTCTG-3’
	Reverse: 5’-TGGCTTTCTCTTTCCTCTTCTC-3’
MMP9 mRNA	Forward: 5’-GGGACGCAGACATCGTCATC-3’
	Reverse: 5’-TCGTCATCGTCGAAATGGGC-3’
ANGPT2 mRNA	Forward: 5’-CTCGAATACGATGACTCGGTG-3’
	Reverse: 5’-TCATTAGCCACTGAGTGTTGTTT-3’
CXCR4 mRNA	Forward: 5’-ACTACACCGAGGAAATGGGCT-3’
	Reverse: 5’-CCCACAATGCCAGTTAAGAAGA-3’
FN1 mRNA	Forward: 5’-CGGTGGCTGTCAGTCAAAG-3’
	Reverse: 5’-AAACCTCGGCTTCCTCCATAA-3’
bFGF mRNA	Forward: 5’-AGAAGAGCGACCCTCACATCA-3’
	Reverse: 5’-CGGTTAGCACACACTCCTTTG-3’
HK2 gDNA	Forward: 5’-CCAGTTCATTCACATCATCAG-3’
	Reverse: 5’-CTTACACGAGGTCACATAGC-3’
VEGFA HRE	Forward: 5’-CAGACTCCACAGTGCATAC-3’
	Reverse: 5’-AGTTTGTGGAGCTGAGAAC-3’
ANGPTL4 HRE	Forward: 5’-ATTTGCTGTCCTGGCATC-3’
	Reverse: 5’-CCAGCTCATTCTCTGGAATC-3’
RPL13A gDNA	Forward: 5’-GAGGCGAGGGTGATAGAG-3’
	Reverse: 5’-ACACACAAGGGTCCAATTC-3’
RAB11B-AS1 HRE	Forward: 5’-TGGAATGGTGTGAAGGTGTC-3’
	Reverse: 5’-AACCTTAACCTCCTTTCCACG-3’

## Sheet: Table S2
Supplementary Table S2. Oligonucleotide sequence used for HIF-1b sgRNA and RAB11B-AS1 shRNA, HRE, and RACE cloning primers
RAB11B-AS1shRNA#1	Forward: 5’-CCGGATGGATTGACAGACCAAATAACTCGAGTTATTTGGTCTGTCAATCCATTTTTT-3’
	Reverse: 5’-AATTAAAAAATGGATTGACAGACCAAATAACTCGAGTTATTTGGTCTGTCAATCCAT-3’
RAB11B-AS1 shRNA#2	Forward: 5’-CCGGGCGGAAGACTGCAGGAATGAACTCGAGTTCATTCCTGCAGTCTTCCGCTTTTT-3’
	Reverse: 5’-AATTAAAAAGCGGAAGACTGCAGGAATGAACTCGAGTTCATTCCTGCAGTCTTCCGC-3’
RAB11B-AS1 WT HRE	Forward: 5’-CGCGCCCGAGTTTCCTGTCTTATTTCCTGAGGACGTGAGAACTGAGCAGACCTCCCTGGCCTTG-3’
	Reverse: 5’-GATCCAAGGCCAGGGAGGTCTGCTCAGTTCTCACGTCCTCAGGAAATAAGACAGGAAACTCGGG-3’
RAB11B-AS1 Mutant HRE	Forward: 5’-CGCGCCCGAGTTTCCTGTCTTATTTCCTGAGGAAAAGAGAACTGAGCAGACCTCCCTGGCCTTG-3’
	Reverse: 5’-GATCCAAGGCCAGGGAGGTCTGCTCAGTTCTCTTTTCCTCAGGAAATAAGACAGGAAACTCGGG-3’
5’ RACE reverse	5’-GATTACGCCAAGCTTCTTCCGCCCCGCCCTCTTGAGCTC-3’
3’ RACE forward	5’-GATTACGCCAAGCTTCAGCCCCACCACAAACACCCGACGGG-3’
RACE long	5’-CTAATACGACTCACTATAGGGCAAGCAGTGGTATCAACGCAGAGT-3'
RACE short	5’-CTAATACGACTCACTATAGGGC-3’
HIF-1b sgRNA	5'-TGATCAGATGTCTAACGATA-3'

## Sheet: Table S3
Supplementary Table S3. Gene ontology analysis of LncRAB11B-AS1-induced genes in hypoxic MDA-MB-231 cells.
Biological Process	Gene number	P-Value
positive regulation of transcription from RNA polymerase II promoter	91	0.02
negative regulation of transcription from RNA polymerase II promoter	77	0.0011
apoptotic process	69	5.4e-05
positive regulation of GTPase activity	57	0.016
negative regulation of apoptotic process	53	0.0012
protein phosphorylation	50	0.0056
inflammatory response	47	0.00064
negative regulation of cell proliferation	46	0.0028
immune response	46	0.0084
positive regulation of apoptotic process	38	0.0016
response to drug	38	0.002
small GTPase mediated signal transduction	35	0.00032
defense response to virus	34	1.3e-07
positive regulation of gene expression	34	0.0019
regulation of apoptotic process	30	0.0011
angiogenesis	29	0.0043
positive regulation of NF-kappaB transcription factor activity	28	1.3e-06
positive regulation of I-kappaB kinase/NF-kappaB signaling	28	5.2e-05
regulation of cell proliferation	27	0.0012
cellular response to DNA damage stimulus	26	0.011
intracellular protein transport	26	0.045
response to virus	24	4.7e-06
actin cytoskeleton organization	24	7.8e-05
response to endoplasmic reticulum stress	23	1.3e-08
response to hypoxia	23	0.0085
type I interferon signaling pathway	22	3e-09
protein stabilization	21	0.0025
response to lipopolysaccharide	21	0.019
cell migration	21	0.03
lipid metabolic process	20	0.024
ER to Golgi vesicle-mediated transport	20	0.028
aging	20	0.037
IRE1-mediated unfolded protein response	18	7.7e-07
cellular response to lipopolysaccharide	18	0.0039
tumor necrosis factor-mediated signaling pathway	18	0.0062
activation of cysteine-type endopeptidase activity involved in apoptotic process	17	0.00034
cellular response to insulin stimulus	16	0.00046
peptidyl-tyrosine dephosphorylation	16	0.0061
negative regulation of viral genome replication	15	5.2e-07
regulation of cell migration	15	0.00096
wound healing	15	0.0021
cellular response to hypoxia	15	0.011
response to stress	14	0.00044
negative regulation of NF-kappaB transcription factor activity	14	0.002
double-strand break repair via homologous recombination	14	0.0029
response to estradiol	14	0.016
G1/S transition of mitotic cell cycle	14	0.038
positive regulation of nitric oxide biosynthetic process	13	4.6e-05
circadian regulation of gene expression	13	0.00081
cellular response to mechanical stimulus	13	0.0057
circadian rhythm	13	0.0088
negative regulation of cell migration	13	0.048
antigen processing and presentation	12	0.0021
negative regulation of ERK1 and ERK2 cascade	12	0.0032
I-kappaB kinase/NF-kappaB signaling	12	0.0042
ER-associated ubiquitin-dependent protein catabolic process	12	0.0042
NIK/NF-kappaB signaling	12	0.0088
defense response	12	0.0098
negative regulation of cysteine-type endopeptidase activity involved in apoptotic process	12	0.012
interferon-gamma-mediated signaling pathway	12	0.015
Golgi organization	12	0.02
lipid transport	12	0.024
positive regulation of peptidyl-tyrosine phosphorylation	12	0.039
cellular response to dexamethasone stimulus	11	2.6e-05
intrinsic apoptotic signaling pathway in response to endoplasmic reticulum stress	11	9.2e-05
negative regulation of fat cell differentiation	11	0.0008
positive regulation of protein catabolic process	11	0.012
memory	11	0.015
double-strand break repair	11	0.023
cellular response to retinoic acid	11	0.033
strand displacement	10	6.5e-05
antigen processing and presentation of peptide antigen via MHC class I	10	0.00023
DNA synthesis involved in DNA repair	10	0.0008
positive regulation of cysteine-type endopeptidase activity involved in apoptotic process	10	0.0022
endoplasmic reticulum unfolded protein response	10	0.0051
positive regulation of fibroblast proliferation	10	0.017
response to mechanical stimulus	10	0.029
COPII vesicle coating	10	0.035
positive regulation of vascular endothelial growth factor production	9	0.00055
negative regulation of type I interferon production	9	0.0012
negative regulation of fibroblast proliferation	9	0.0015
negative regulation of extrinsic apoptotic signaling pathway via death domain receptors	9	0.0023
positive regulation of tyrosine phosphorylation of Stat3 protein	9	0.0059
positive regulation of protein kinase activity	9	0.021
positive regulation of intrinsic apoptotic signaling pathway	8	0.0094
carbohydrate phosphorylation	7	0.0055
cellular response to amino acid starvation	7	0.0085
positive regulation of extrinsic apoptotic signaling pathway	7	0.01
toll-like receptor signaling pathway	7	0.013
regulation of transcription from RNA polymerase II promoter in response to hypoxia	7	0.015
cellular response to glucose starvation	7	0.018
positive regulation of phagocytosis	7	0.018
regulation of tumor necrosis factor-mediated signaling pathway	7	0.021
intrinsic apoptotic signaling pathway	7	0.021
intrinsic apoptotic signaling pathway in response to DNA damage by p53 class mediator	7	0.024
protein secretion	7	0.028
telomere maintenance via recombination	7	0.028
protein kinase B signaling	7	0.032
positive regulation of cell cycle	7	0.037
positive regulation of endoplasmic reticulum stress-induced intrinsic apoptotic signaling pathway	6	0.00041
negative regulation of Rho protein signal transduction	6	0.0036
activation of NF-kappaB-inducing kinase activity	6	0.0084
oocyte maturation	6	0.0084
folic acid metabolic process	6	0.0084
positive regulation of defense response to virus by host	6	0.02
response to X-ray	6	0.02
regulation of transcription involved in G1/S transition of mitotic cell cycle	6	0.024
endocrine pancreas development	6	0.04
UDP-N-acetylglucosamine biosynthetic process	5	0.0065
3'-UTR-mediated mRNA destabilization	5	0.0092
PERK-mediated unfolded protein response	5	0.0092
activation of cysteine-type endopeptidase activity involved in apoptotic signaling pathway	5	0.013
mitotic cell cycle arrest	5	0.013
regulation of innate immune response	5	0.013
protein folding in endoplasmic reticulum	5	0.013
interleukin-1-mediated signaling pathway	5	0.016
retrograde protein transport, ER to cytosol	5	0.016
glutathione biosynthetic process	5	0.027
intermediate filament organization	5	0.027
regulation of extrinsic apoptotic signaling pathway via death domain receptors	5	0.033
cell-cell junction organization	5	0.04
positive regulation of histone acetylation	5	0.04
cellular sodium ion homeostasis	5	0.048
negative regulation of myeloid cell differentiation	5	0.048
cellular hyperosmotic response	4	0.0069
cellular response to phorbol 13-acetate 12-myristate	4	0.011
negative regulation of cell division	4	0.011
negative regulation of collagen biosynthetic process	4	0.017
response to molecule of bacterial origin	4	0.024
regulation of macrophage activation	4	0.024
ATF6-mediated unfolded protein response	4	0.024
interleukin-6-mediated signaling pathway	4	0.024
regulation of keratinocyte differentiation	4	0.033
positive regulation of lipid storage	4	0.033
positive regulation of T cell differentiation in thymus	4	0.033
positive regulation of response to DNA damage stimulus	4	0.033
endoplasmic reticulum mannose trimming	4	0.033
glucose 6-phosphate metabolic process	4	0.033
sulfur amino acid metabolic process	4	0.043
positive regulation of retrograde protein transport, ER to cytosol	3	0.016
regulation of cytokine-mediated signaling pathway	3	0.016
base conversion or substitution editing	3	0.03
positive regulation of heart growth	3	0.03
response to human chorionic gonadotropin	3	0.03
interleukin-1 beta production	3	0.047
regulation of defense response to virus by host	3	0.047
chromosome breakage	3	0.047
negative regulation of beta-amyloid formation	3	0.047
